# Supplementary material
Source: Springer Nature journal article supplement (https://www.springermedizin.de/resource/supplementary/12885_2011_2883_MOESM12_ESM.pdf/9462152)

**A**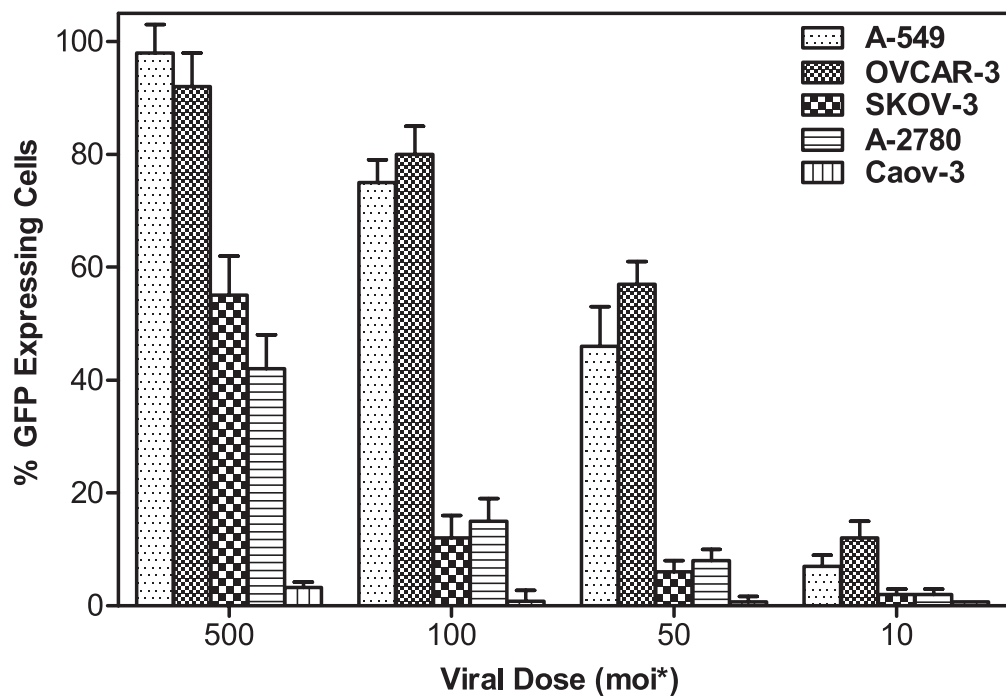**B****OVCAR-3**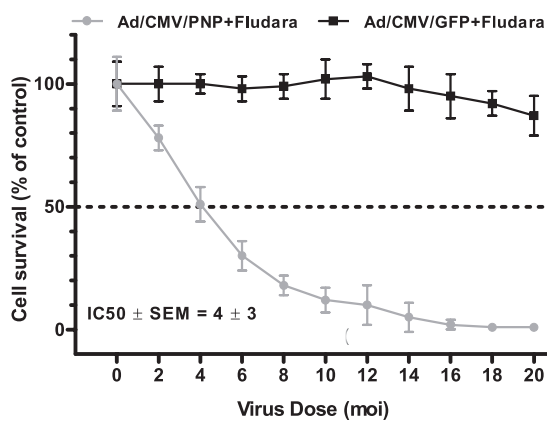**A-2780**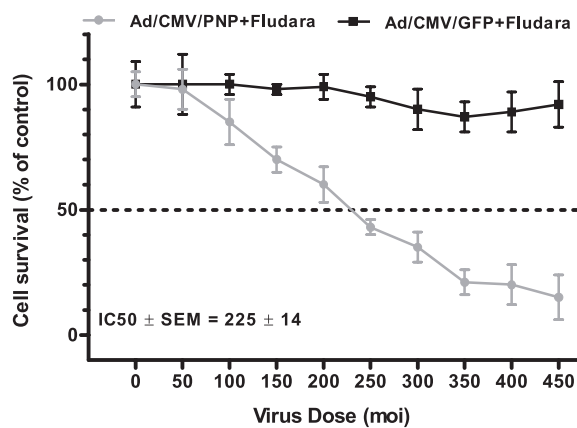**SKOV-3**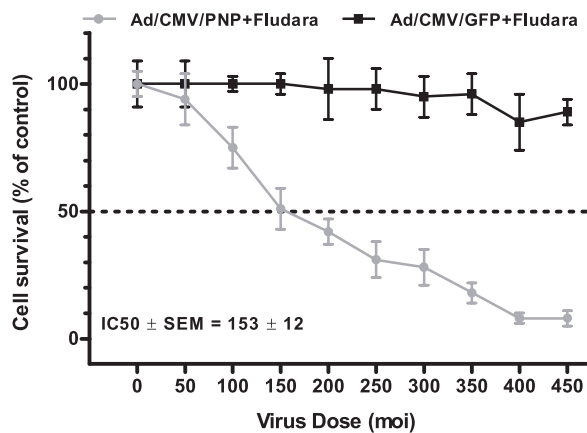**Caov-3**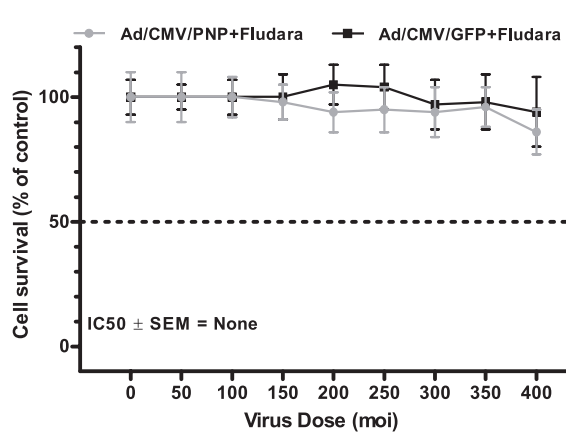

Supplement: MOESM12 [file 9462152]
